# Supplementary material for: Single cell analysis reveals distinct immune landscapes in transplant and primary sarcomas that determine response or resistance to immunotherapy
Source: PubMed Central journal article supplement (PMC7746723; doi:10.1038/s41467-020-19917-0), 2020-12-17
Supplement: 41467_2020_19917_MOESM1_ESM.pdf [file 41467_2020_19917_MOESM1_ESM.pdf]

## SUPPLEMENTARY INFORMATION

## Supplementary Figure 1.

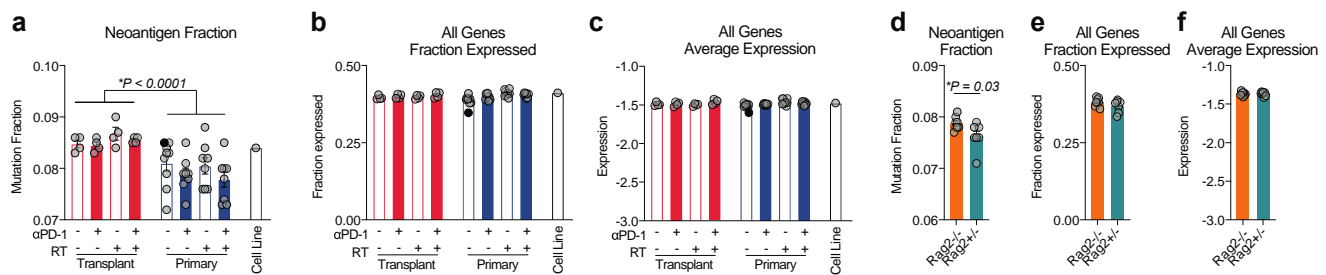

**Supplementary Figure 1. Evidence of immune editing in primary tumors.** **a**, Fraction of nonsynonymous mutations predicted to be neoantigenic in transplant and primary tumors harvested 3 days after specified treatment. The original primary tumor (filled, black) used to generate the cell line (right) from which the transplant tumors were derived is also shown.  $P < 0.0001$  for transplant vs primary tumors. **b**, Fraction of all genes identified to be expressed ( $>0$  FPKM) by RNA sequencing of transplant tumors, primary tumors, and the cell line. **c**, Average expression level of all genes in transplant tumors, primary tumors and the cell line quantified as fragments per kilobase of transcript per million mapped reads (FPKM), upper quartile normalized,  $\log_2$  transformed. **d**, Fraction of nonsynonymous mutations in primary p53/MCA tumors from  $Rag2^{-/-}$  and  $Rag2^{+/-}$  mice predicted to be neoantigenic. **e**, Fraction of all genes identified to be expressed ( $>0$  FPKM) by RNA sequencing of primary tumors from  $Rag2^{-/-}$  and  $Rag2^{+/-}$  mice. **f**, Average expression level of all genes in tumors from  $Rag2^{-/-}$  and  $Rag2^{+/-}$  mice, quantified as FPKM, upper quartile normalized,  $\log_2$  transformed. For **a-f**, each symbol represents an individual mouse. Mean  $\pm$  SEM. **a-c**, Transplant tumors:  $n = 4$ ; primary tumors:  $n = 8$ . Significance determined by three-way ANOVA with Tukey's multiple comparisons test. **d-f**,  $Rag2^{-/-}$  tumors:  $n = 8$ ;  $Rag2^{+/-}$  tumors:  $n = 7$ . Significance determined by unpaired two-tailed t-test. Source data are provided as a Source Data file.

## Supplementary Figure 2.

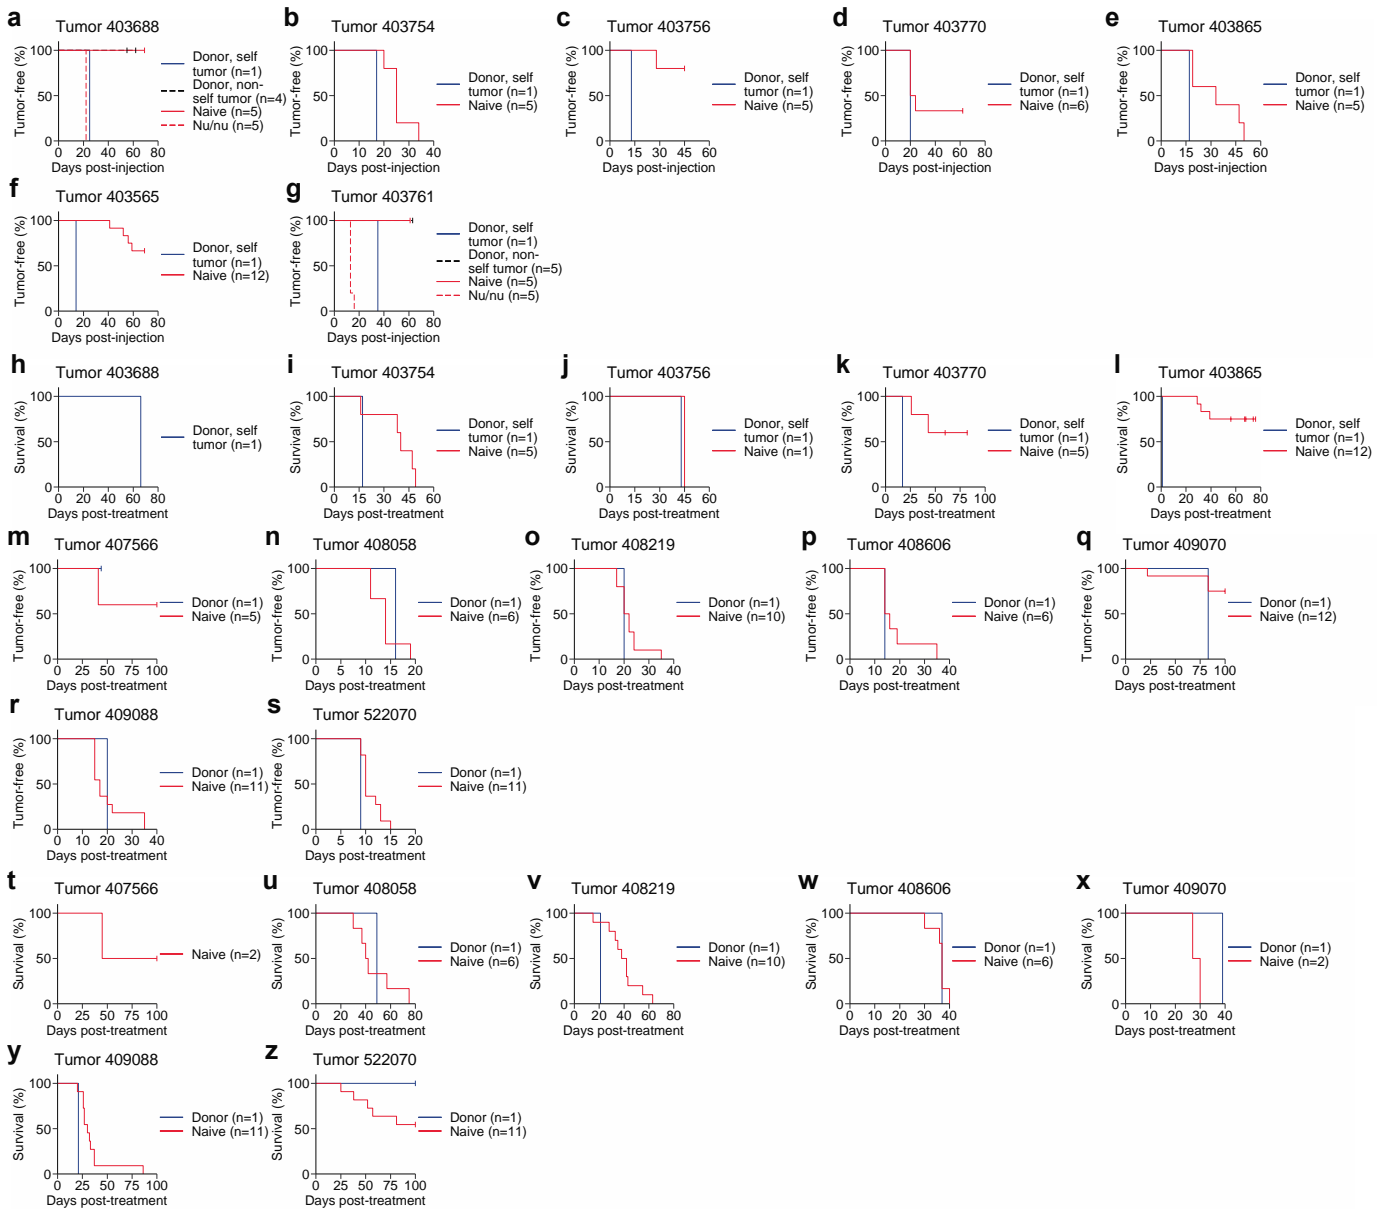

**Supplementary Figure 2. Tumor outgrowth and survival after cell line injection into donor and naive mice.** **a-g**, Time to tumor onset data from Fig. 3b and 3e, separated by cell line. *Nu/nu* (**a, g**) indicates cell line injection into a T-cell deficient athymic (nude) mice. **h-l**, Survival after treatment with 10 Gy + anti-PD-1 from Fig. 3c, separated by cell line. **m-s**, Time to tumor onset data from Fig. 3g, separated by cell line. **t-z**, Survival after treatment with 20 Gy + anti-PD-1 from Fig. 3h, separated by cell line. Survival curves estimated using Kaplan-Meier method. Source data are provided as a Source Data file.

### Supplementary Figure 3.

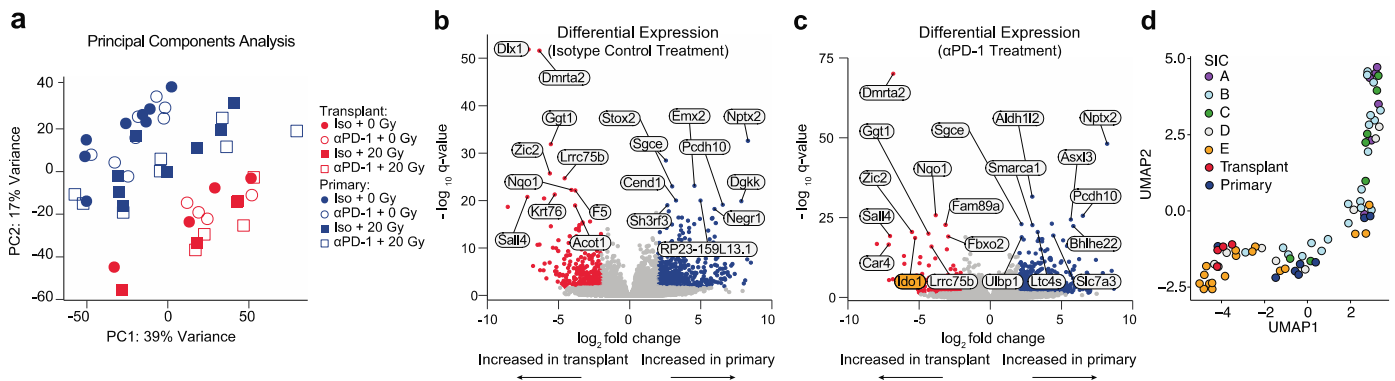

**Supplementary Figure 3. Transcriptional analysis of primary and transplant sarcomas.** **a**, Principal components analysis of bulk tumor RNA sequencing harvested 3 days after treatment. Each symbol represents an individual mouse's tumor. **b**, Volcano plot showing the log-fold-changes and Benjamini Hochberg-corrected p-values (q-values) for differential expression between transplant and primary tumors treated with isotype control antibodies. **c**, Volcano plot showing the log-fold-changes and Benjamini Hochberg-corrected p-values (q-values) for differential expression between transplant and primary tumors treated with anti-PD-1 antibodies. For **b** and **c**, genes with a negative log-fold-change are more highly expressed among transplant tumors (red), and genes with a positive log-fold change are more highly expressed in primary tumors (blue). Genes are colored blue or red if log-fold-change > 4 or < -4 and Benjamini-Hochberg adjusted p value < 0.05 (Wald test). **d**, Uniform manifold approximation and projection (UMAP) representation of cellular composition quantified by bulk RNA-seq followed by CIBERSORTx analysis of human and murine sarcomas. For the human sarcomas, undifferentiated pleomorphic sarcomas were analyzed and previously defined SIC is indicated. Source data are provided as a Source Data file.

Supplementary Figure 4.

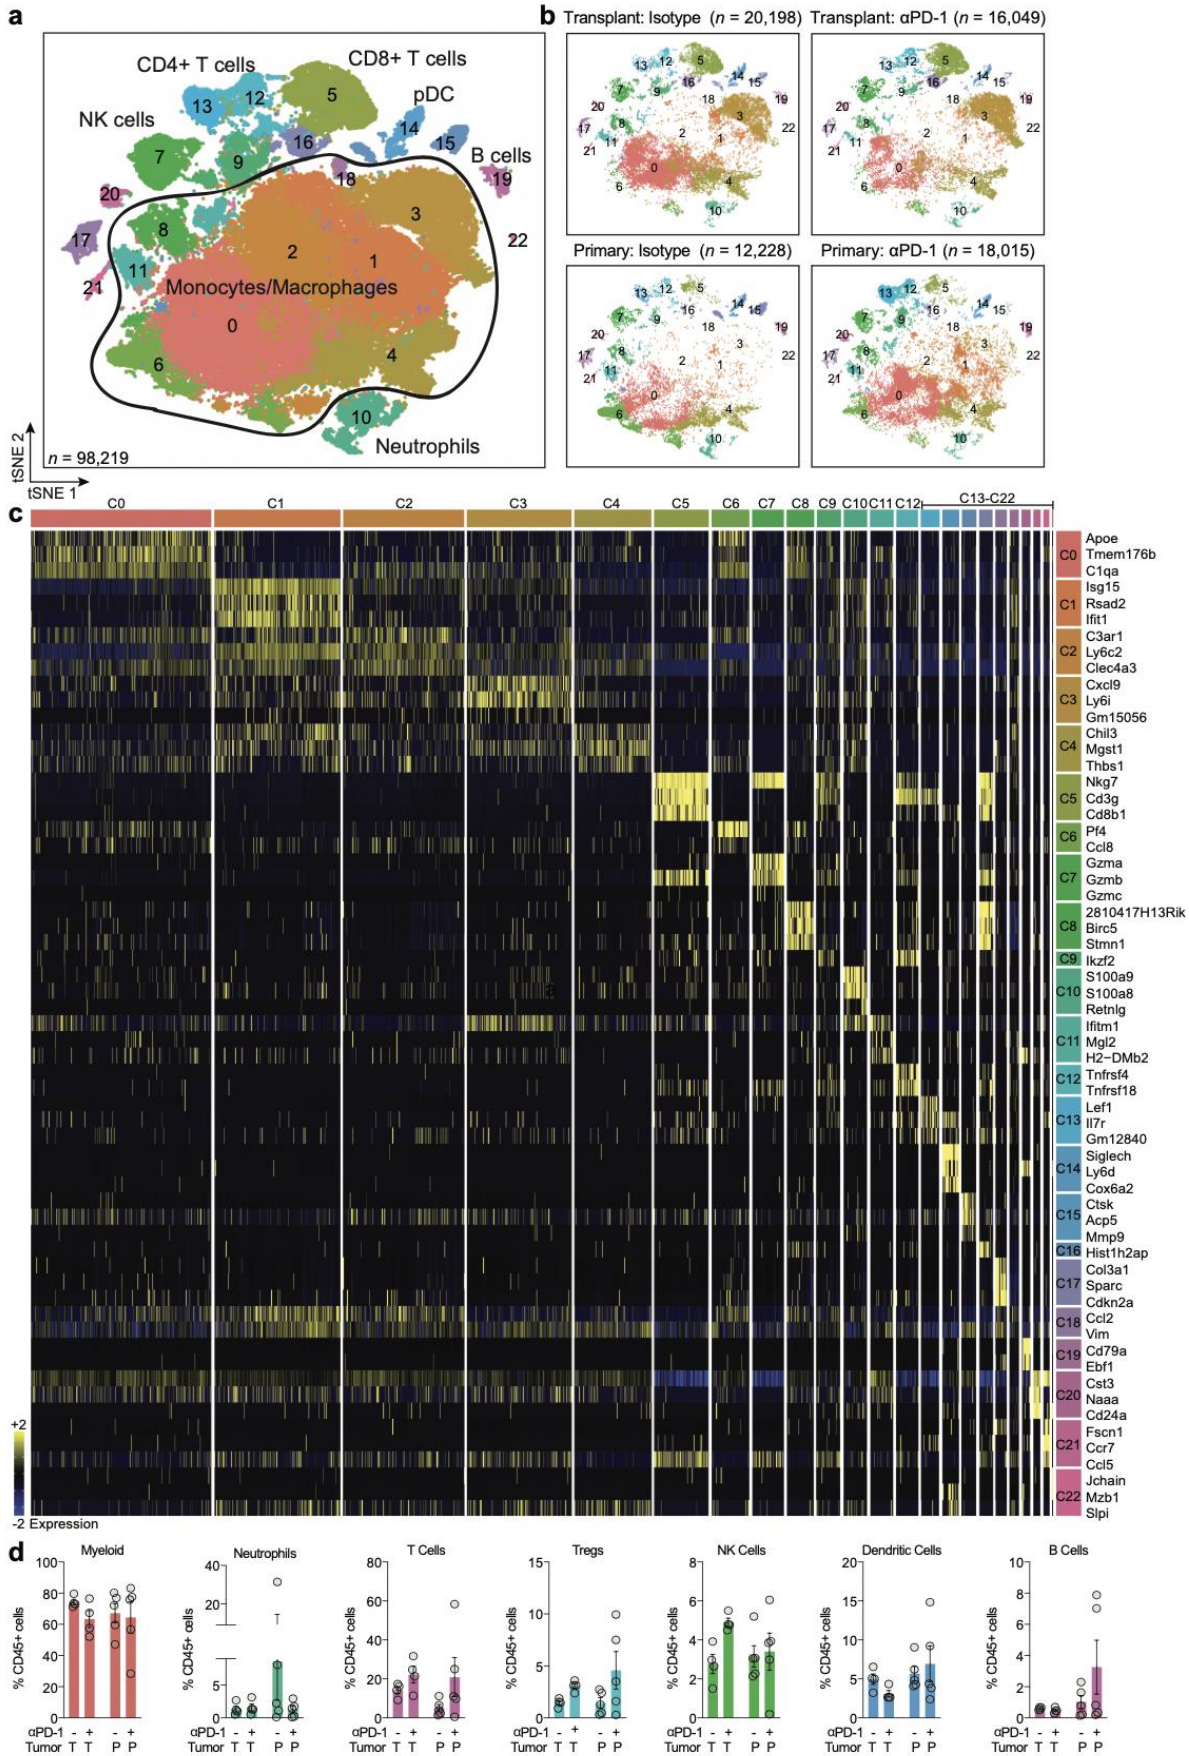

#### **Supplementary Figure 4. Characterization of immune microenvironment by single-cell RNA**

**sequencing. a**, CD45+ immune cells from all tumor and treatment groups, overlaid on tSNE representation and color coded by cluster. Cell populations expressing genes consistent with monocyte/macrophage phenotype are outlined. **b**, Distribution of immune cells separated by indicated tumor and treatment type. **c**, Scaled expression values of top three discriminative genes per cluster. **d**, Bar graphs comparing frequency of indicated cell type (% CD45+) from transplant (T) or primary (P) tumors after  $\alpha$ PD-1 (+) or isotype control (-). Each symbol represents an individual mouse; n = 4 per group for transplant tumors, n = 5 per group for primary tumors. Data show mean  $\pm$  SEM. Source data are provided as a Source Data file.

Supplementary Figure 5.

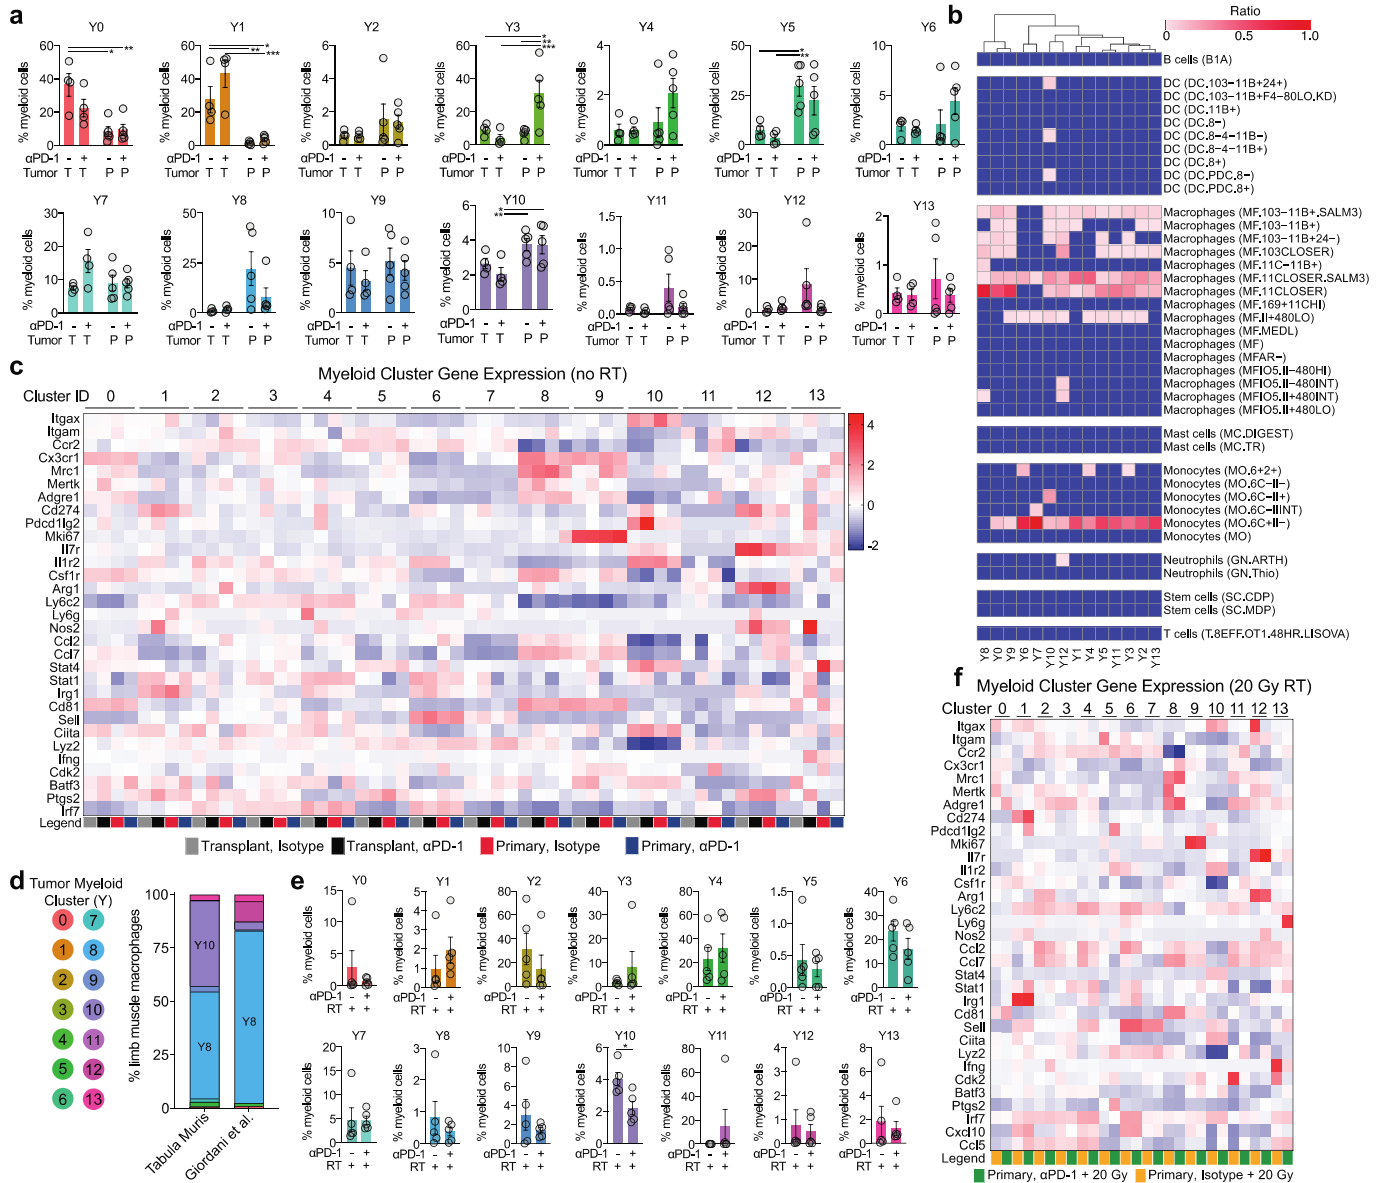

**Supplementary Fig. 5. Defining myeloid populations using scRNA-seq.**

**a**, Bar graphs comparing frequency of indicated cell type (% myeloid cells) from transplant (T) or primary (P) tumors after  $\alpha$ PD-1 (+) or isotype control (-). Data show mean  $\pm$  SEM, \* $P < 0.05$  by 2-way ANOVA and Tukey's multiple comparisons test. Each symbol represents an individual mouse;  $n = 4$  per group for transplant tumors,  $n = 5$  per group for primary tumors. Y0: \* $P = 0.0032$ , \*\* $P = 0.0043$ ; Y1: \* $P = 0.0226$ , \*\* $P = 0.012$ , \*\*\* $P = 0.0004$ ; Y3: \* $P = 0.028$ , \*\* $P = 0.011$ , \*\*\* $P = 0.0069$ ; Y5: \* $P = 0.037$ , \*\* $P = 0.0129$ ; Y10: \* $P = 0.0497$ , \*\* $P = 0.0478$ . **b**, SingleR analysis of myeloid clusters, annotated based on correlation profiles with bulk RNA-seq from the Immunological Genome Project

(ImmGen) database. The heatmap color scale corresponds to the ratio of cells attributed to that cell type for each cluster. **c**, Heat map comparing expression of genes in indicated clusters and treatment groups. **d**, Single-cell RNA-seq data from normal limb muscle macrophages published by the Tabula Muris Consortium<sup>1</sup> and Giordani *et al.*<sup>2</sup> compared to tumor myeloid clusters Y0-Y14. The tumor myeloid cluster most similar to each normal muscle macrophage cell was identified, and the percent of normal limb muscle macrophage cells most similar to each myeloid cluster is reported. **e**, Bar graphs comparing frequency of indicated cell type (% myeloid cells) from primary tumors 3 days after 20 Gy RT and either  $\alpha$ PD-1 (+) or isotype control (-). Data show mean  $\pm$  SEM, Y10: \* $P=0.0145$  by two-tailed unpaired t-test. Each symbol represents an individual mouse; n = 5 per group. **f**, Heat map comparing expression of genes in indicated clusters. Source data are provided as a Source Data file.



Supplementary Figure 6.

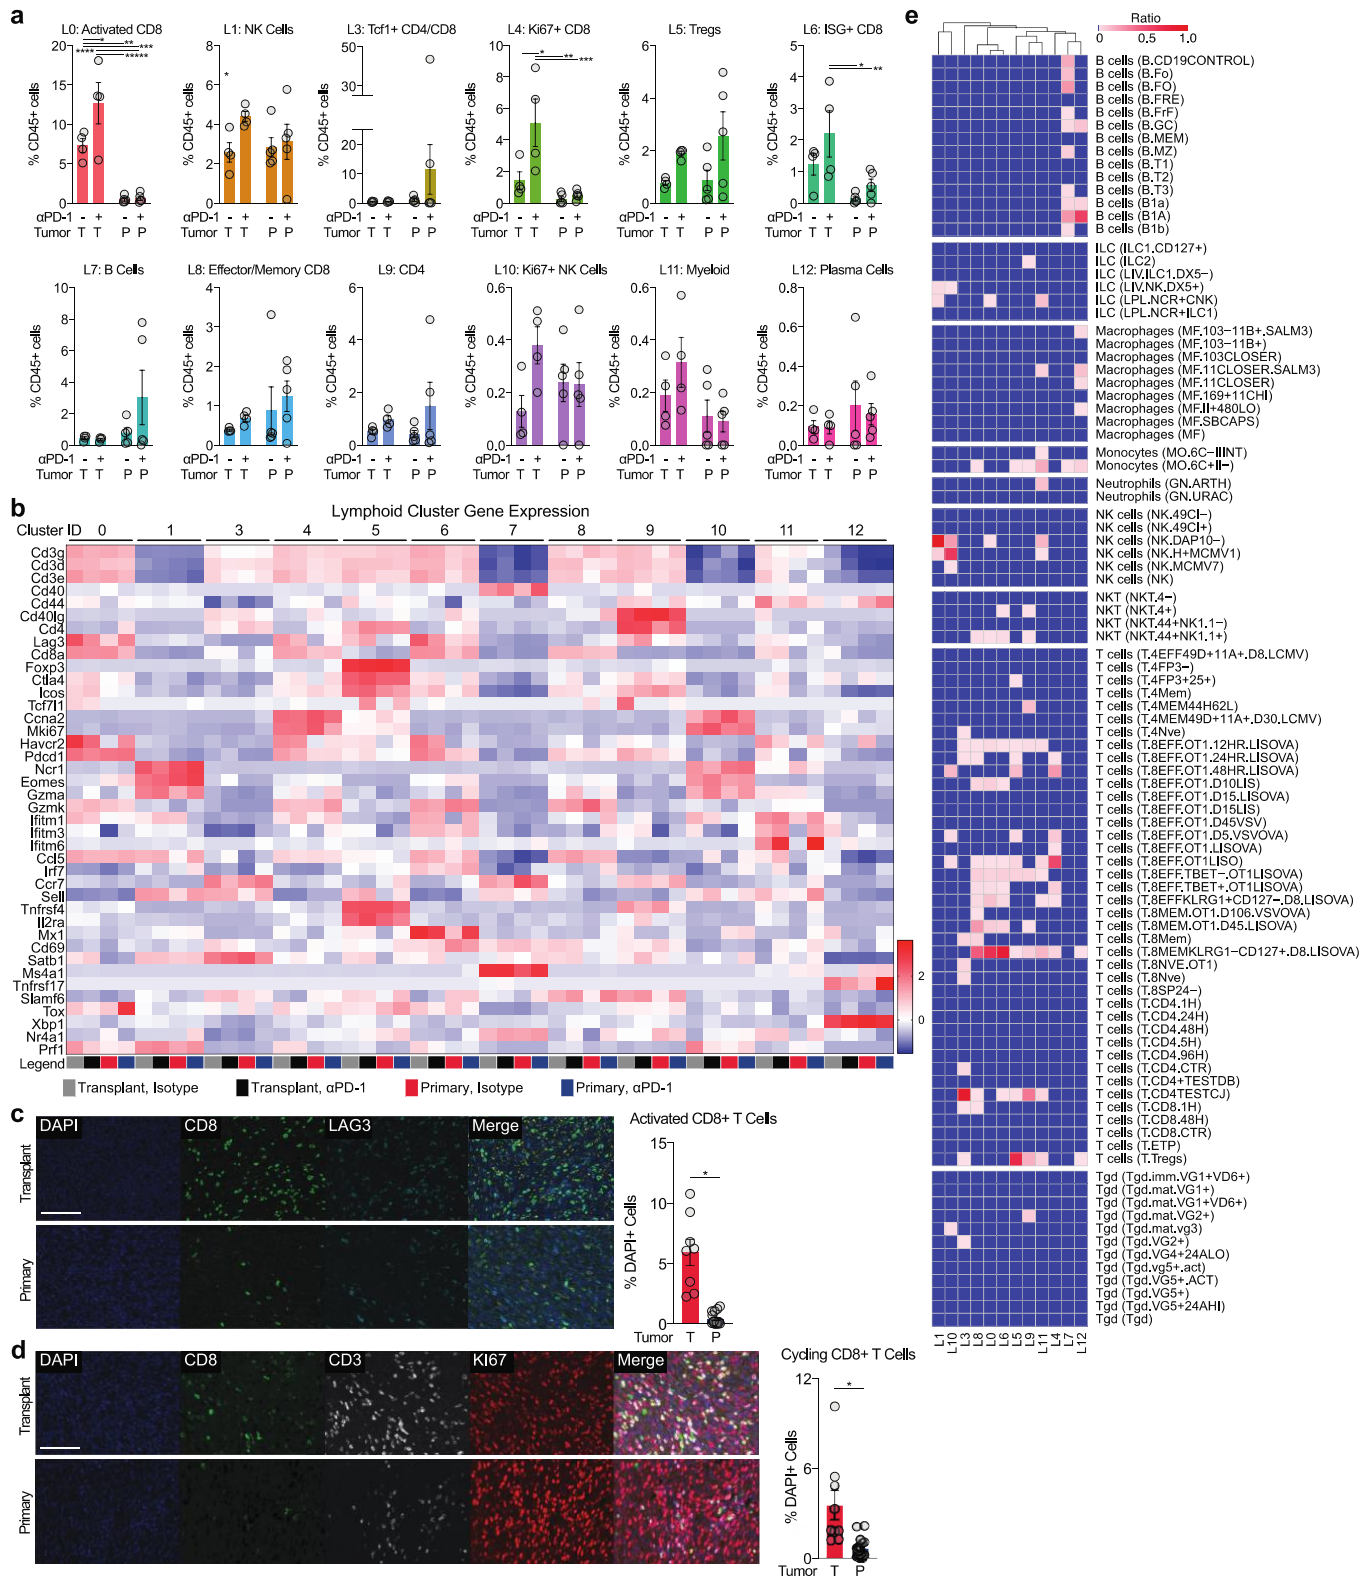

Supplementary Fig. 6. Phenotypes of lymphoid populations. a, Bar graphs comparing frequency of indicated cell type (% lymphoid cells) from transplant (T) or primary (P) tumors after αPD-1 (+) or isotype

control (-). Each symbol represents an individual mouse;  $n = 4$  per group for transplant tumors,  $n = 5$  per group for primary tumors. Data show mean  $\pm$  SEM.  $*P < 0.05$  by 2-way ANOVA and Tukey's multiple comparisons test. L0:  $*P = 0.0478$ ,  $**P = 0.007$ ,  $***P = 0.0083$ ,  $****P < 0.0001$ ,  $*****P < 0.0001$ ; L4:  $*P = 0.0189$ ,  $**P = 0.0015$ ,  $***P = 0.0024$ ; L6:  $*P = 0.0081$ ,  $**P = 0.0376$ . **b**, Heat map comparing expression of genes in indicated clusters and treatment groups. **c**, Immunofluorescence staining for activated CD8+ T cells in transplant (T, top,  $n = 8$ ) or primary (P, bottom,  $n = 16$ ) tumors harvested 3 days after  $\alpha$ PD-1 treatment. All images were taken at the same magnification, so the scale bar in the top left image applies to all images in panel **c**. Scale bar = 100  $\mu$ m. Quantification of images (right),  $*P < 0.0001$  by two-tailed unpaired t-test. Data show mean  $\pm$  SEM. **d**, Immunofluorescence staining for cycling CD8+ T cells (Ki67+) in transplant (T, top,  $n = 9$ ) or primary (P, bottom,  $n = 19$ ) tumors harvested 3 days after  $\alpha$ PD-1 treatment. All images were taken at the same magnification, so the scale bar in the top left image applies to all images in panel **d**. Scale bar = 100  $\mu$ m. Quantification of images (right),  $*P = 0.0003$  by two-tailed unpaired t-test. Data show mean  $\pm$  SEM. **e**, SingleR analysis of lymphoid clusters. The heatmap color scale corresponds to the ratio of cells attributed to that cell type for each cluster. Source data are provided as a Source Data file. For **c** and **d**, three tissue slices from each independent tumor were stained, quantified, and the resulting 3 values were averaged together to obtain a single value from each tumor. Sample sizes reflect the number of independent tumors (each from a separate mouse) that were used for staining. Each dot represents the average quantification from 3 tissue sections from a single tumor.

Supplementary Figure 7.

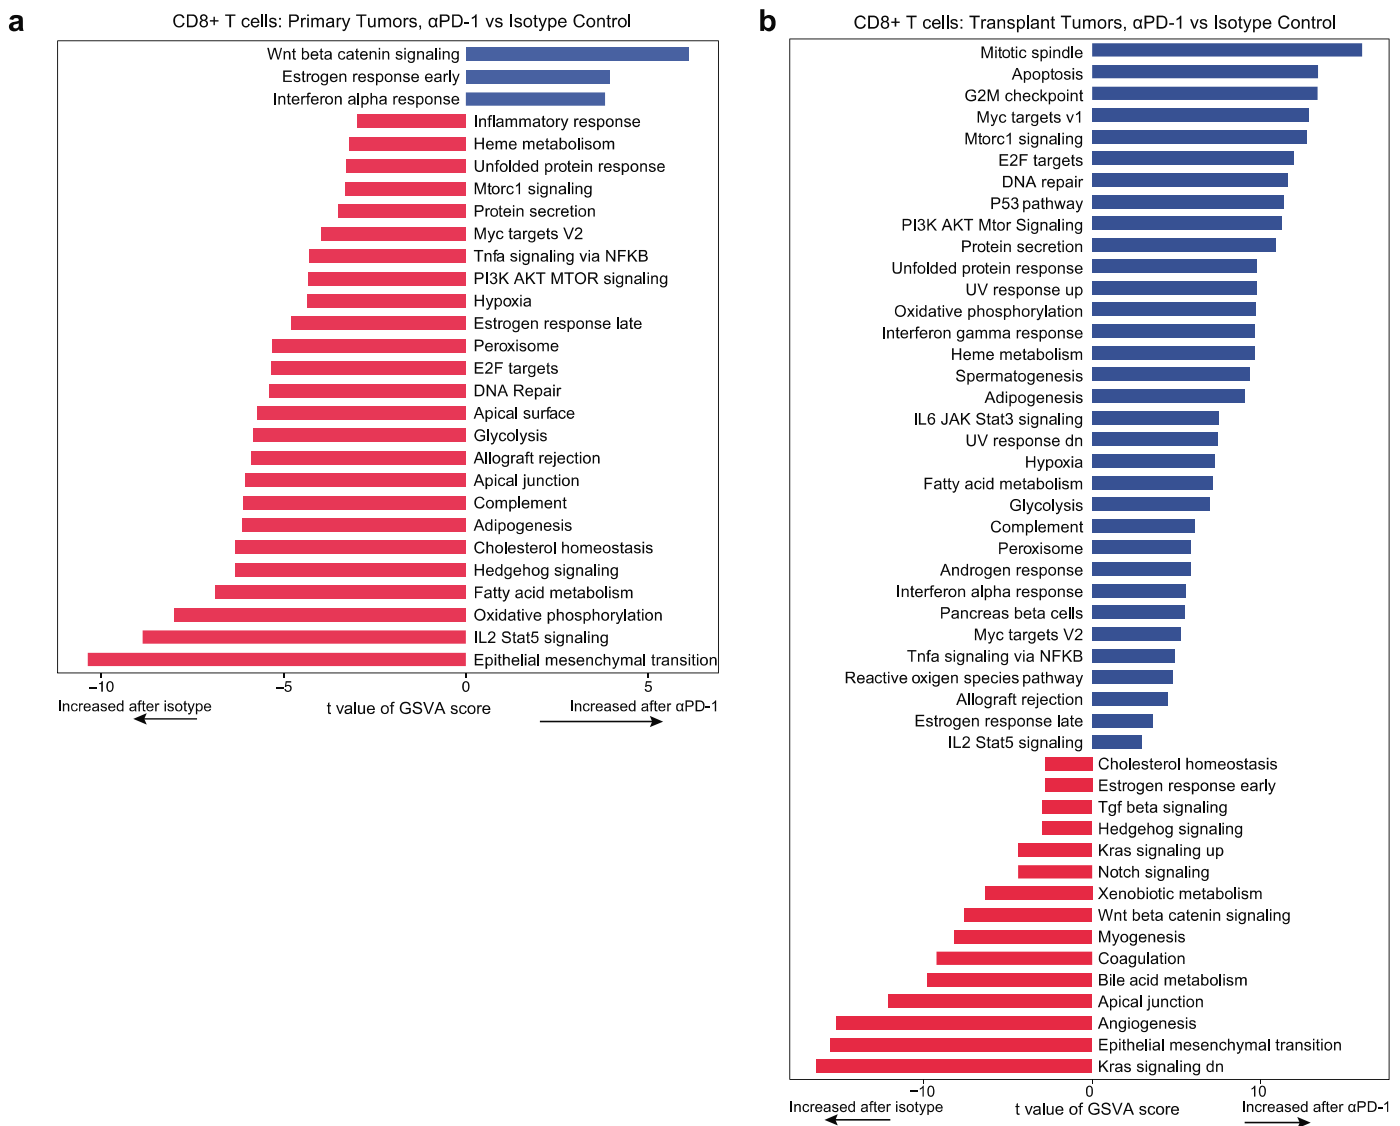

**Supplementary Figure 7. Transcriptional signatures of CD8+ T cells.** **a**, Pathways with significantly different activities scored per cell comparing gene set variation analysis (GSEA) enrichment scores between CD8+ T cells from primary tumors treated with  $\alpha$ PD-1 vs isotype control antibody (n = 2,473 cells analyzed). **b**, Pathways with significantly different activities scored per cell comparing GSEA enrichment scores between CD8+ T cells from transplant tumors treated with  $\alpha$ PD-1 vs isotype control antibody (n = 5,828 cells analyzed). Plotted are t statistics from a simple linear model. Benjamini-Hochberg method was used to adjust p values for multiple hypothesis testing. Pathways shown are significant at false discovery rate <0.01.

**SUPPLEMENTARY TABLE 1**

| <b>Reagent/Resource</b>                          | <b>Source</b> | <b>Catalogue Number</b> | <b>Dilution</b> |
|--------------------------------------------------|---------------|-------------------------|-----------------|
| Anti-mouse CD45 (Clone 30-F11) BV605             | Biolegend     | 103139                  | 1:100           |
| Anti-mouse CD45 (Clone 30-F11) APC-Cy7           | Biolegend     | 103116                  | 1:100           |
| Anti-Mouse CD11b (M1/70)-148Nd                   | Fluidigm      | 3148003B                | 1:400           |
| Anti-Mouse CD19 (6D5)-166Er                      | Fluidigm      | 3166015B                | 1:200           |
| Anti-Mouse CD45 89Y                              | Fluidigm      | 3089005B                | 1:200           |
| Anti-Mouse CX3CR1 (SA011F11)-164Dy A18           | Fluidigm      | 3164023B                | 1:200           |
| Anti-Mouse CD11c (N418)-142Nd                    | Fluidigm      | 3142003B                | 1:100           |
| Anti-Human/Mouse CD44 (IM7)-171Yb                | Fluidigm      | 3171003B                | 1:100           |
| Anti-Mouse I-A/IE(M5/114.15.2)-209Bi             | Fluidigm      | 3209006B                | 1:100           |
| Anti-mouse CD335 (NKp46)                         | Biolegend     | 29A1.4                  | 1:100           |
| Anti-Mouse CD154/CD40 Ligand (MR1)-170Er         | Fluidigm      | 3170011B                | 1:100           |
| Anti-Mouse Ly-108 Monoclonal Antibody (13G3-19D) | ThermoFisher  | 14-1508-82              | 1:100           |
| Anti-Mouse F4/80 (BM8)-146Nd                     | Fluidigm      | 3146008B                | 1:50            |
| Anti-Mouse CD366/TIM-3 (RMT3-23)-162Dy           | Fluidigm      | 3162029B                | 1:50            |
| Anti-Mouse CD278 ICOS (7E.17G9) 176Yb            | Fluidigm      | 3176014B                | 1:50            |
| Anti-Mouse CD4 (RM4-5)-145Nd                     | Fluidigm      | 3145002B                | 1:50            |
| Anti-Mouse CD62L(MEL-14)-160Gd                   | Fluidigm      | 3160008B                | 1:50            |
| Anti-Mouse CD8a (53-6.7)-168Er                   | Fluidigm      | 3168003B                | 1:50            |
| Anti-Mouse Ly-6C (HK1.4)-150Nd                   | Fluidigm      | 3150010B                | 1:50            |
| Anti-Mouse Ly-6G (1A8)-141Pr                     | Fluidigm      | 3141008B                | 1:50            |
| Anti-Mouse MHC Class I (28-14-8)- 144Nd          | Fluidigm      | 3144016B                | 1:50            |
| Anti-Mouse CD274/PD-L1 (10F.9G2)-153Eu           | Fluidigm      | 3153016B                | 1:50            |
| Anti-mouse CD124 (I015F8)                        | Biolegend     | 144802                  | 1:50            |
| Anti-mouse Siglec H antibody (Clone 551)         | Biolegend     | 129602                  | 1:50            |
| Anti-mouse CD103 Antibody (Clone 2E7)            | Biolegend     | 121402                  | 1:50            |
| Anti-mouse CD223/Lag3 Antibody (Clone C9B7W)     | Biolegend     | 125202                  | 1:50            |
| Anti-Mouse CCR2                                  | R&D Systems   | MAB55381-100            | 1:50            |
| Anti-Mouse CD3e (145-2C11)-152Sm                 | Fluidigm      | 3152004B                | 1:25            |
| Anti-Mouse/Rat CD40 (HM40-3)-161Dy               | Fluidigm      | 3161020B                | 1:25            |
| Anti-Mouse CD206/MMR (C068C2)-169Tm              | Fluidigm      | 3169021B                | 1:100           |
| Anti-mouse Nos2 (clone 5C1B52)                   | Biolegend     | 690902                  | 1:100           |
| Anti-Mouse Bcl2 (10C4)                           | ThermoFisher  | 14-6992-82              | 1:100           |
| Anti-Mouse CD152 antibody (Clone 9H10)           | Biolegend     | 106202                  | 1:100           |
| Anti-mouse EOMES (clone dan11mag)                | ThermoFisher  | 14-4875-82              | 1:67            |

**SUPPLEMENTARY TABLE 1, CONTINUED**

|                                                  |                 |             |        |
|--------------------------------------------------|-----------------|-------------|--------|
| Anti-Mouse CD279/PD-1 (29F.1A12)-159Tb           | Fluidigm        | 3159024B    | 1:50   |
| Anti-Human Ki-67(B56)-172Yb                      | Fluidigm        | 3172024B    | 1:50   |
| Anti-Mouse Foxp3(FJK-16s)-158Gd                  | Fluidigm        | 3158003A    | 1:50   |
| Anti-Human Granzyme B (GB11)-173Yb               | Fluidigm        | 3173006B    | 1:25   |
| TCF1/TCF7 (C63D9) Rabbit mAb                     | Cell Signaling  | 2203S       | 1:16   |
| Maxpar X8 Antibody Labeling Kit, 155Gd           | Fluidigm        | 201155A     | n/a    |
| Maxpar X8 Antibody Labeling Kit, 174Yb           | Fluidigm        | 201174A     | n/a    |
| Maxpar X8 Antibody Labeling Kit, 156Gd           | Fluidigm        | 201156A     | n/a    |
| Maxpar X8 Antibody Labeling Kit, 147Sm           | Fluidigm        | 201147A     | n/a    |
| Maxpar X8 Antibody Labeling Kit, 143Nd           | Fluidigm        | 201143A     | n/a    |
| Maxpar X8 Antibody Labeling Kit, 154Sm           | Fluidigm        | 201154A     | n/a    |
| Maxpar X8 Antibody Labeling Kit, 165Ho           | Fluidigm        | 201165A     | n/a    |
| Maxpar X8 Antibody Labeling Kit, 151Eu           | Fluidigm        | 201151A     | n/a    |
| Maxpar X8 Antibody Labeling Kit, 167Er           | Fluidigm        | 201167A     | n/a    |
| Maxpar X8 Antibody Labeling Kit, 149Sm           | Fluidigm        | 201149A     | n/a    |
| Maxpar X8 Antibody Labeling Kit, 175Lu           | Fluidigm        | 201175A     | n/a    |
| Foxp3 / Transcription Factor Staining Buffer Set | ThermoFisher    | 00-5523-00  | n/a    |
| Cell-ID 20-Plex Pd Barcoding Kit                 | Fluidigm        | 201060      | n/a    |
| Mouse Tumor Dissociation Kit                     | Miltenyi Biotec | 130-096-730 | n/a    |
| Zombie Yellow Fixable Viability Kit              | Biolegend       | 423103      | 1:400  |
| Cell-ID Cisplatin 195                            | Fluidigm        | 201064      | 1:4000 |
| Cell-ID Intercalator-Ir—125 $\mu$ M              | Fluidigm        | 201192A     | 1:2000 |
| 16% Formaldehyde Solution                        | Thermo Fisher   | 28906       | n/a    |
| RPMI 1640 Media                                  | ThermoFisher    | 11875135    | n/a    |
| Fetal Bovine Serum, heat inactivated             | ThermoFisher    | 16140071    | n/a    |
| Antibody Stabilizer                              | Candor          | 131 125     | n/a    |
| HBSS, no calcium, no magnesium, no phenol red    | ThermoFisher    | 14175103    | n/a    |

**SUPPLEMENTARY TABLE 2**

| Immunofluorescence Staining Reagents |          |                                |                       |                          |               |                    |            |
|--------------------------------------|----------|--------------------------------|-----------------------|--------------------------|---------------|--------------------|------------|
| Panel                                | Position | Antibody                       | Clone / Host          | Company / Item           | Concentration | Secondary          | OPAL Fluor |
| 1                                    | 1        | CD3                            | CD3-12 / Rat          | Bio-Rad / MCA1477        | 0.5ug/ml      | Rat impress        | 570        |
| 1                                    | 2        | CD4                            | 4SM95 / Rat           | Invitrogen / 14-9766-82  | 2.5ug/ml      | Rat impress        | 690        |
| 1                                    | 3        | CD8a                           | 4SM15 / Rat           | Invitrogen / 14-0808-82  | 0.5ug/ml      | Rat impress        | 520        |
| 1                                    | 4        | FoxP3                          | FJK-16S / Rat         | eBioscience / 14-5773-82 | 0.125ug/ml    | Rat impress        | 620        |
| 1                                    | 5        | Ki67                           | D3B5 / Rabbit         | Cell Signaling / 12202S  | 0.1ug/ml      | Rabbit powervision | 650        |
| 2                                    | 1        | CD8a                           | 4SM15 / Rat           | eBioscience / 14-0808-82 | 0.5ug/ml      | Rat impress        | 480        |
| 2                                    | 2        | LAG-3                          | EPR2029 4-77 / Rabbit | Abcam / ab209238         | 0.98ug/ml     | Rabbit powervision | 520        |
| 2                                    | 4        | CD3                            | CD3-12 / Rat          | Bio-Rad / MCA1477        | 3.34 ug/ml    | Rat impress        | 690        |
| 1, 2                                 | n/a      | Rat ImmPress HRP Polymer       | secondary             | Vector Labs / MP-7444-15 | RTU           | n/a                | n/a        |
| 1, 2                                 | n/a      | Rabbit PowerVision HRP Polymer | secondary             | Leica / PV6119           | RTU           | n/a                | n/a        |

## SUPPLEMENTARY REFERENCES

1. Tabula Muris Consortium *et al.* Single-cell transcriptomics of 20 mouse organs creates a Tabula Muris. *Nature* **562**, 367–372 (2018).
2. Giordani, L. *et al.* High-Dimensional Single-Cell Cartography Reveals Novel Skeletal Muscle-Resident Cell Populations. *Mol. Cell* **74**, 609–621.e6 (2019).
